# Supplementary material for: In situ growth of CuS nanoparticles on g-C3N4 nanosheets for H2 production and the degradation of organic pollutant under visible-light irradiation
Source: PubMed Central journal article supplement (PMC9070010; doi:10.1039/c9ra03532j), 2019-08-15
Supplement: RA-009-C9RA03532J-s001.pdf [file RA-009-C9RA03532J-s001.pdf]

## Electronic supplementary information (ESI)

### **In-situ growth of CuS nanoparticles on g-C<sub>3</sub>N<sub>4</sub> nanosheets for H<sub>2</sub> production and the degradation of organic pollutant under visible-light irradiation**

Zhenhe Xu<sup>\*a</sup>, Baotong Xu<sup>a</sup>, Kun Qian<sup>a</sup>, Zheng Li<sup>a</sup>, Fu Ding<sup>\*a</sup>, Miaomiao Fan<sup>b</sup>, Yaguang Sun<sup>a</sup>, Yu Gao<sup>\*a</sup>

*<sup>a</sup>The Key Laboratory of Inorganic Molecule-Based Chemistry of Liaoning Province, College of Applied Chemistry, Shenyang University of Chemical Technology, Shenyang, 110142, China*

*<sup>b</sup>Liaoyang Institute for Drug Control, Liaoyang, 111000, China*

E-mail: xuzh@syuct.edu.cn (Z.H. Xu); dingfu@syuct.edu.cn (F. Ding); gaoy777@126.com (Y. Gao)

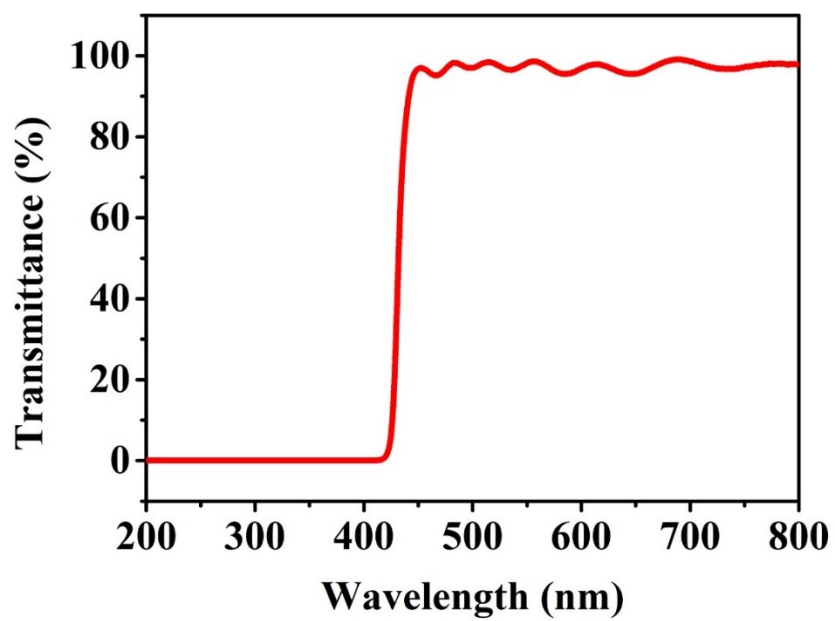

**Fig. S1** Transmission spectra of a 420 nm cut-off filter used for photocatalytic measurements.

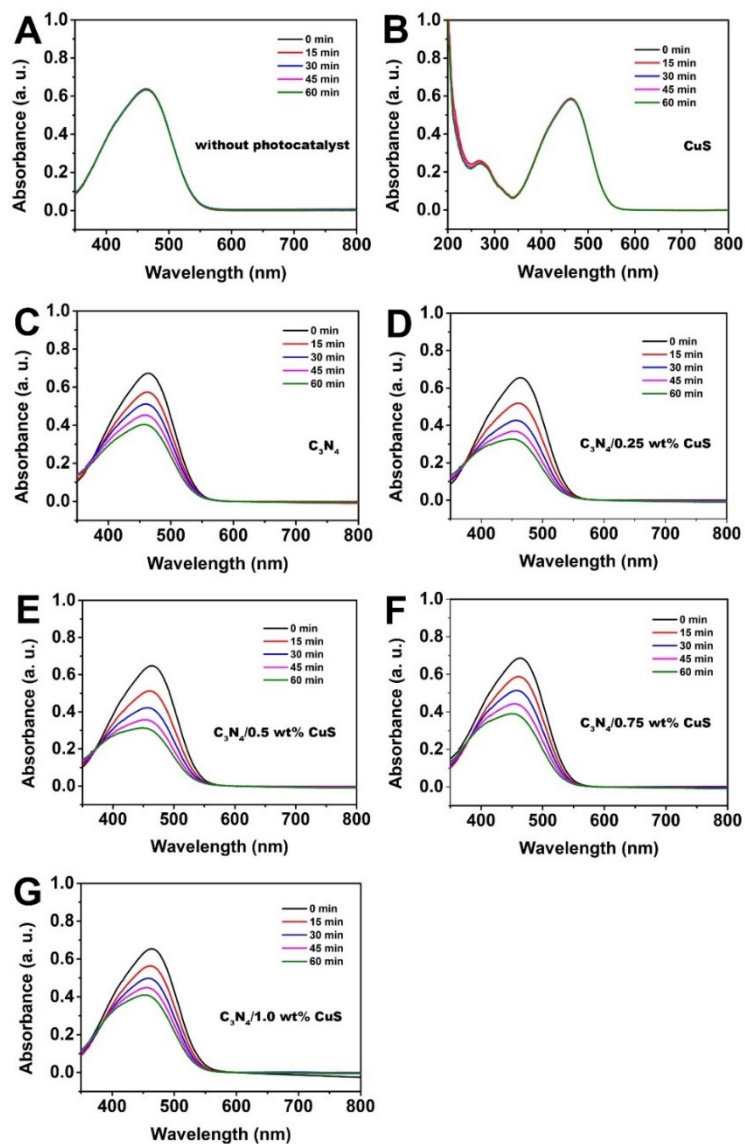

**Fig. S2** UV-vis absorption spectra of MO solution separated from the suspensions containing (A) without photocatalyst, (B) CuS, (C)  $C_3N_4$ , (D)  $C_3N_4/0.25$  wt% CuS, (E)  $C_3N_4/0.5$  wt% CuS, (F)  $C_3N_4/0.75$  wt% CuS, and (G)  $C_3N_4/1.0$  wt% CuS.
